# Supplementary material for: Unique and outstanding catalytic behavior of a novel MOF@COF composite as an emerging and powerful catalyst in the preparation of 2,3-dihydroquinazolin-4(1H)-one derivatives
Source: Royal Society of Chemistry journal article supplement (doi:10.1039/d3na00805c), 2023-01-01
Supplement: d3na00805c1.pdf [file d3na00805c1.pdf]

## *Supporting Information*

**Unique and outstanding catalytic behavior of a novel MOF@COF composite  
as an emerging and powerful catalyst in the preparation of  
2,3-dihydroquinazolin-4(1H)-one derivatives**

Mohammad Ali Ghasemzadeh\*, Boshra Mirhosseini-Eshkevari

*Department of Chemistry, Qom Branch, Islamic Azad University, Qom, I. R. Iran*

*Post Box: 37491-13191, I. R. Iran.*

*Corresponding author, E-mail addresses: qasemzade.a@gmail.com; ma.ghasemzadeh@iau.ac.ir*

**3-(4-bromophenyl)-2-(4-(methylthio) phenyl)-2,3-dihydroquinazolin-4(1H)-one (4m).**

White solid; m.p. 246-248°C. IR spectrum  $\nu$ ,  $\text{cm}^{-1}$ : 3322, 1606, 1674, 1521, 1422, 1383, 1282, 1018, 1025;  $^1\text{H}$  NMR (250 MHz,  $\text{DMSO}-d_6$ ): 2.75 (s, 3H,  $\text{CH}_3$ ), 4.65 (s, 1H, CH), 6.23 (s, 1 H, NH), 6.76-7.04 (m, 4H, ArH), 7.28-7.33 (m, 4H, ArH), 7.74-7.78 (m, 4H, ArH);  $^{13}\text{C}$  NMR (62.9 MHz,  $\text{DMSO}-d_6$ )  $\delta$ : 27.39, 33.43, 68.62, 76.82, 87.26, 87.26, 112.03, 123.52, 124.34, 131.34, 132.43, 135.26, 138.56, 145.44, 147.33, 148.69, 153.47, 162.24, 164.38, 172.21, 181.42, 186.21; Anal. Calcd. For:  $\text{C}_{21}\text{H}_{17}\text{BrN}_2\text{OS}$ : C 59.30, H 4.03, N 6.59. Found: C 58.21, H 4.01, N 6.53; MS (EI) (m/z): 424.03 ( $\text{M}^+$ ).

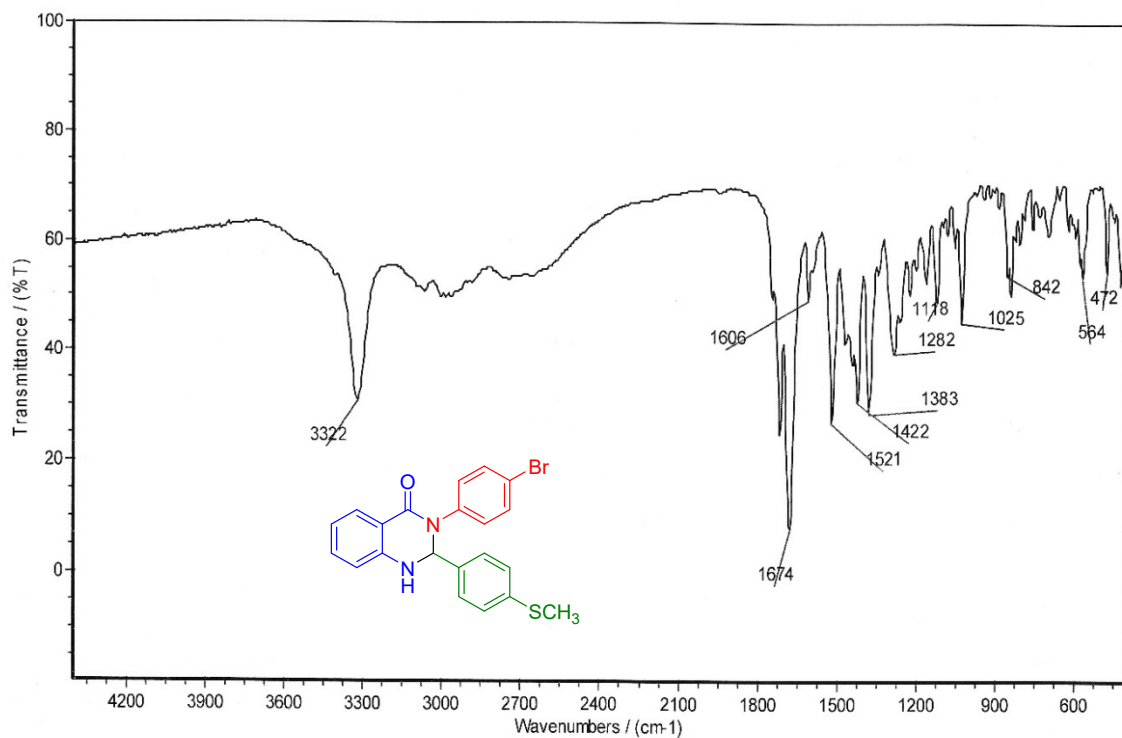

Fig. S1. FT-IR spectrum of 4m.

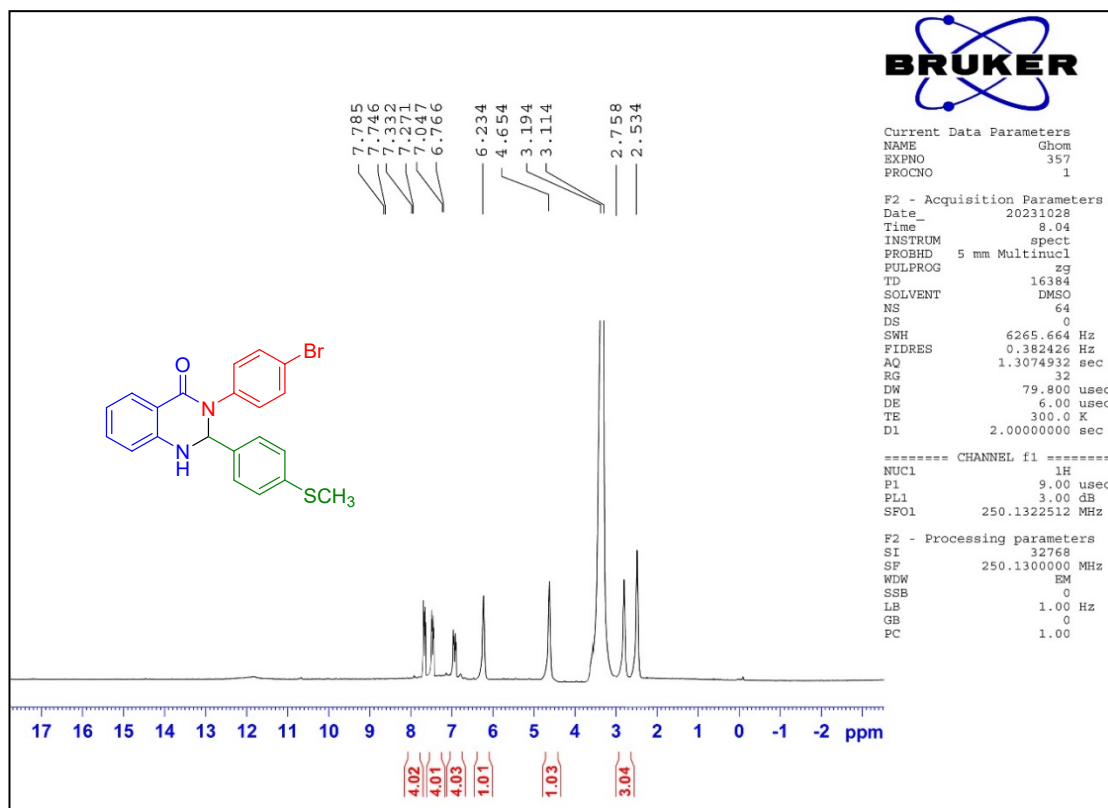

Fig. S2. <sup>1</sup>H-NMR spectrum of 4m.

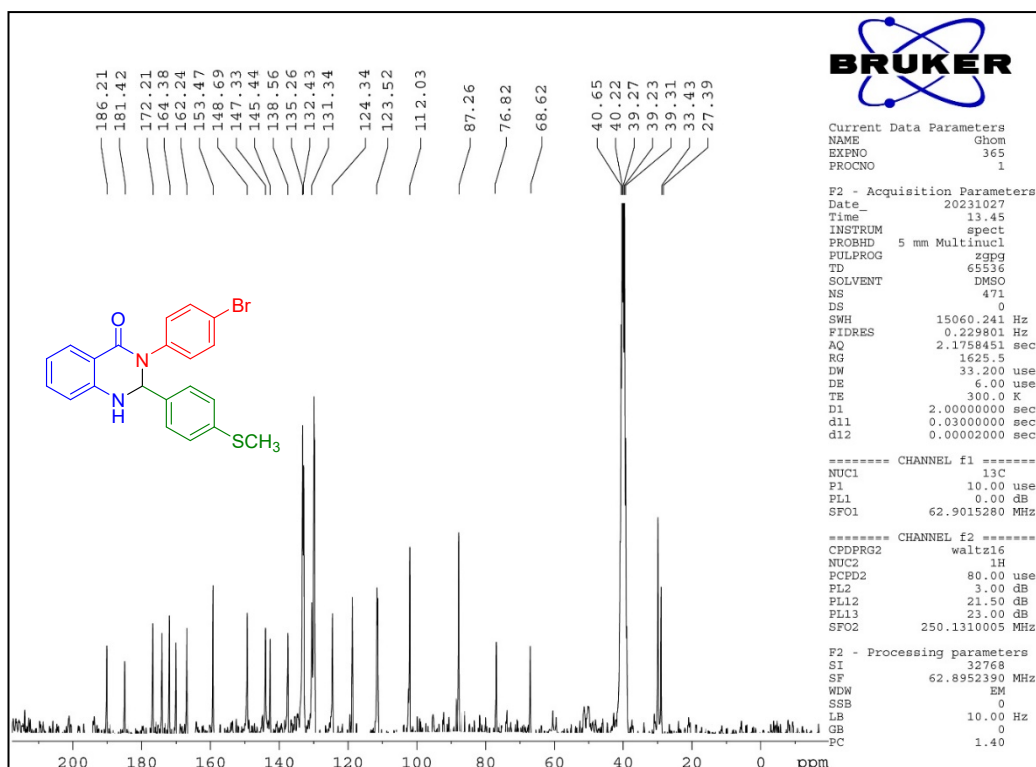

Fig. S3.  $^{13}\text{C}$ -NMR spectrum of 4m.

**2-(4-(methylthio)phenyl)-2,3-dihydroquinazolin-4(1H)-one (6g).**

White solid; m.p. 235-237°C. IR spectrum  $\nu$ ,  $\text{cm}^{-1}$ : 3364, 3171, 1674, 1591, 1500, 1475, 1375, 1203;  $^1\text{H}$  NMR (250 MHz,  $\text{DMSO-}d_6$ ): 2.37 (s, 3H,  $\text{CH}_3$ ), 4.21 (s, 1H, CH), 6.12 (s, 1 H, NH), 7.26-7.44 (d, 2H,  $J = 8.2$  Hz, ArH), 7.53-7.64 (d, 2H,  $J = 8.3$  Hz, ArH), 7.85-7.98 (m, 4H, ArH) 9.32 (s, 1 H, NH);  $^{13}\text{C}$  NMR (62.9 MHz,  $\text{DMSO-}d_6$ )  $\delta$ : 28.23, 30.77, 76.61, 87.62, 93.24, 116.46, 117.41, 123.54, 127.61, 136.51, 141.63, 143.01, 144.32, 159.37; Anal. Calcd. For:  $\text{C}_{15}\text{H}_{14}\text{N}_2\text{OS}$ : C 66.64, H 5.22, N 10.36. Found: C 66.61, H 5.26, N 10.32; MS (EI) (m/z): 270.08 ( $\text{M}^+$ ).

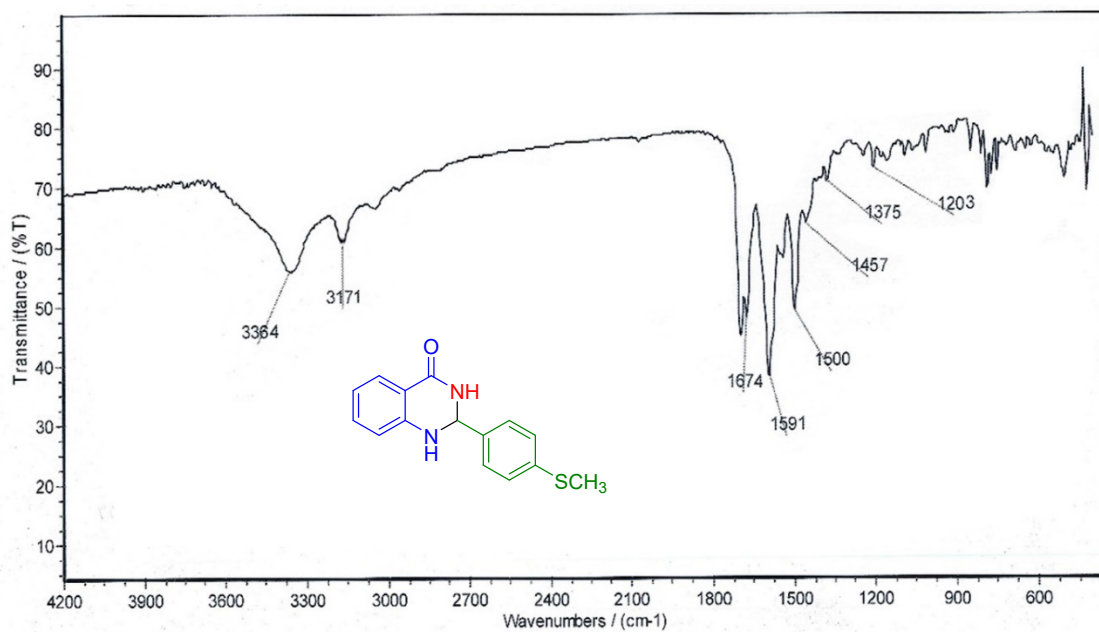

Fig. S4. FT-IR spectrum of 6g.

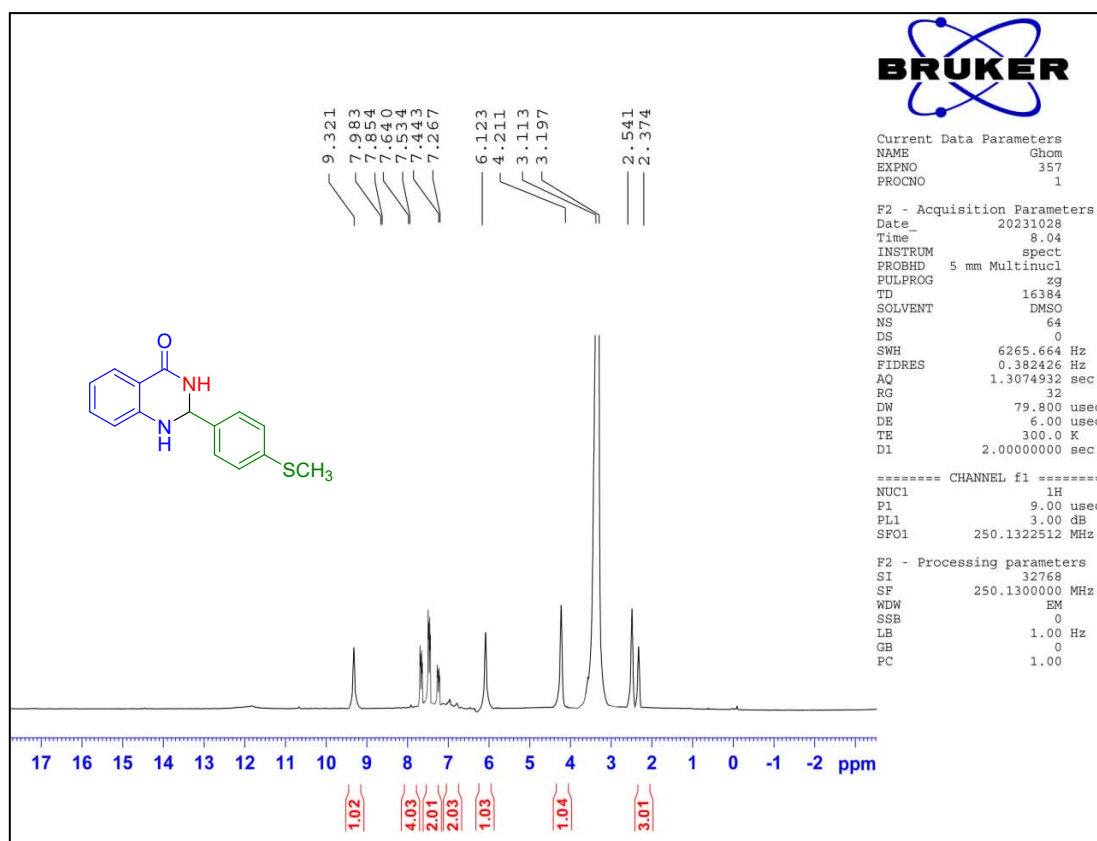

Fig. S5. <sup>1</sup>H-NMR spectrum of 6g.

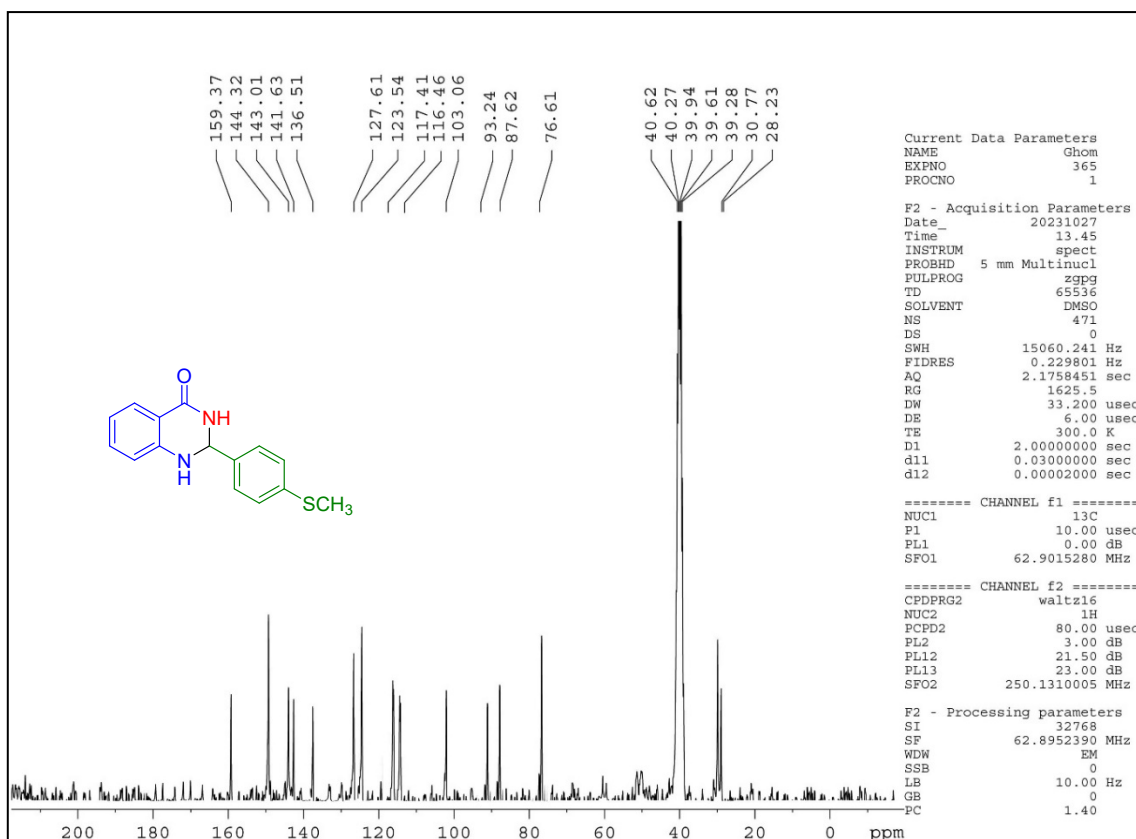

Fig. S6.  $^{13}\text{C}$ -NMR spectrum of 6g.

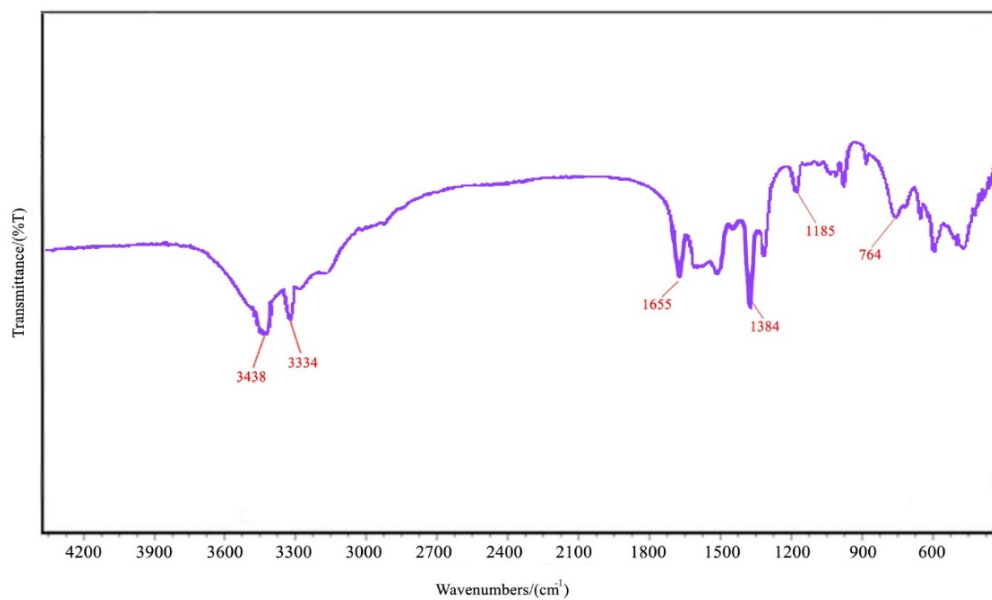

Fig. S7. FT-IR spectra of UiO-66-NH<sub>2</sub>-MOF

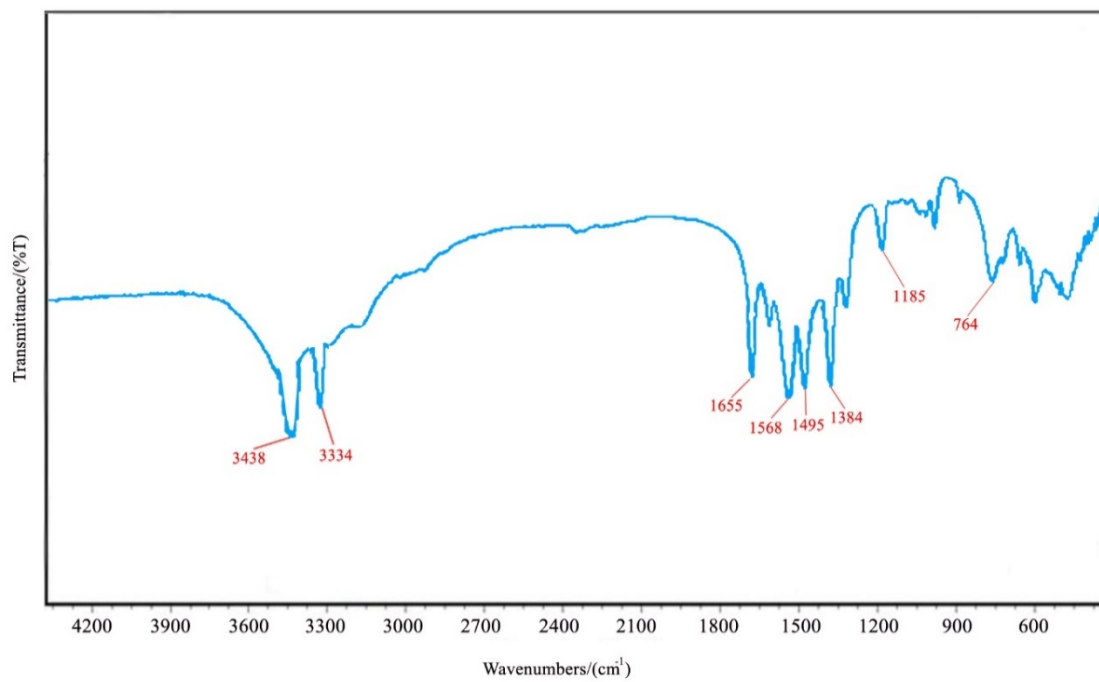

**Fig. S8.** FT-IR UiO-66-NH<sub>2</sub>-MOF@COF.

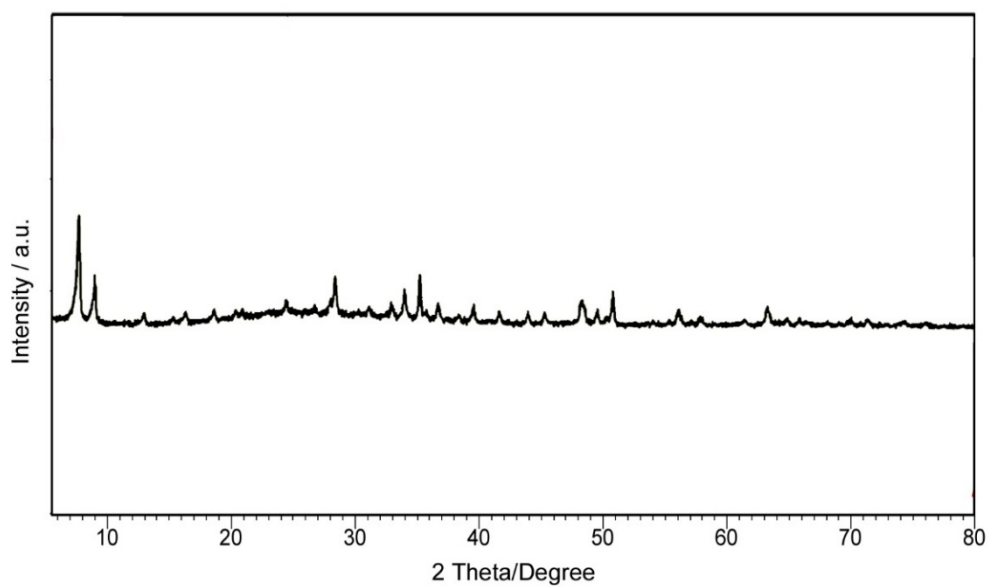

**Fig. S9.** XRD pattern of simulated UiO-66-NH<sub>2</sub>-MOF.

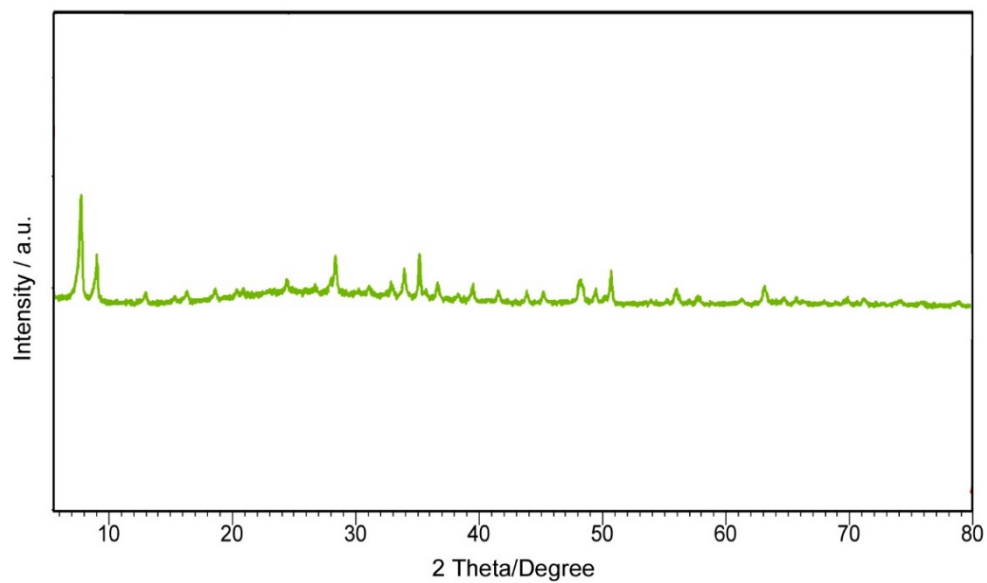

**Fig. S10.** XRD pattern of UiO-66-NH<sub>2</sub>-MOF.

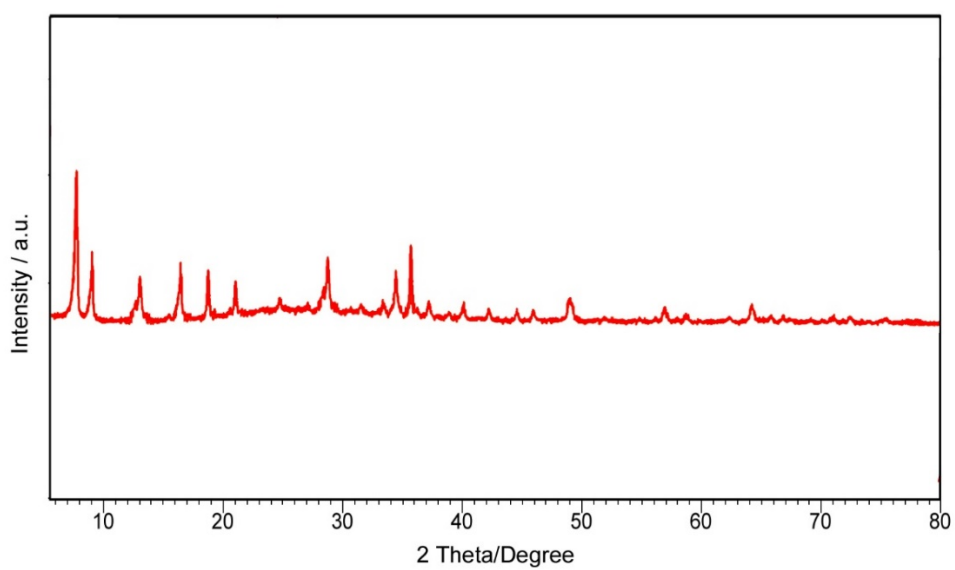

**Fig. S11.** XRD pattern of UiO-66-NH<sub>2</sub>-MOF@COF.
